# Supplementary material for: Assessment of Capecitabine and Bevacizumab With or Without Atezolizumab for the Treatment of Refractory Metastatic Colorectal Cancer: A Randomized Clinical Trial
Source: PubMed Central journal article supplement — JAMA Netw Open. 2022 Feb 18;5(2):e2149040. doi: 10.1001/jamanetworkopen.2021.49040 (PMC8857687; doi:10.1001/jamanetworkopen.2021.49040), 2022-02-18

## Supplementary Online Content

Mettu NB, Ou FS, Zemla TJ, et al. Assessment of capecitabine and bevacizumab with or without atezolizumab for the treatment of refractory metastatic colorectal cancer: a randomized clinical trial. *JAMA Netw Open*. 2022;5(2):e2149040.  
doi:10.1001/jamanetworkopen.2021.49040

**eMethods 1.** Additional Inclusion and Exclusion Criteria

**eMethods 2.** Criteria for Bevacizumab and Atezolizumab Interruption and Discontinuation

**eTable 1.** Dosing Information for Atezolizumab and Placebo

**eTable 2.** Dosing Information for Bevacizumab

**eTable 3.** Dosing Information for Capecitabine

**eTable 4.** *BRAF* Variation Status of Primary Analysis Population

**eTable 5.** Sites of Metastatic Disease (mITT)

**eTable 6.** Response Rates in the Investigational Arm by Sites of Metastatic Disease

**eTable 7.** Immune-Related Adverse Events Grade 3 or Higher Considered at Least Possibly Related to Treatment

**eFigure 1.** PFS of Atezolizumab vs Placebo by MSS Status

**eFigure 2.** Sensitivity Analysis of PFS

This supplementary material has been provided by the authors to give readers additional information about their work.

**eMethods 1. Additional Inclusion and Exclusion Criteria**

Inclusion criteria: Measurable disease, Eastern Cooperative Oncology Group performance status (ECOG PS) 0 or 1, life expectancy  $\geq 3$  months, and adequate organ function. Prior therapies such as ramucirumab, aflibercept, regorafenib, and trifluridine-tipiracil were permitted but not required.

Exclusion criteria: Chemotherapy, biologic anticancer therapy, investigational agent, or central field radiation therapy  $\leq 28$  days before randomization (local or stereotactic radiation  $\leq 14$  days before randomization); history of allergic reactions to therapeutic antibodies; known dihydropyrimidine dehydrogenase deficiency; known untreated central nervous system metastases; significant cardiac risk factors; recent surgeries, procedures, or endoluminal stents; and history of inflammatory disorders, autoimmune disorders, immunosuppression, immunodeficiency, or infectious conditions.

## **eMethods 2.** Criteria for Bevacizumab and Atezolizumab Interruption and Discontinuation

Infusion of bevacizumab was interrupted if an infusion-related reaction was suspected.

Bevacizumab dosing was temporarily suspended if patients experienced a serious adverse event (AE) or a grade 3/4 nonserious AE assessed by the investigator as related to bevacizumab. If the AE resolved to grade  $\leq 1$ , bevacizumab could be restarted at the same dose level. If bevacizumab was delayed due to toxicity for  $>42$  days after the next dose should have been given, patients permanently discontinued bevacizumab treatment.

Atezolizumab treatment was interrupted if patients experienced any of the following: grade 2 pulmonary AEs, including pneumonitis; grade 2 total bilirubin, alanine aminotransferase (ALT), or aspartate aminotransferase (AST) increase; grade 2 ocular AEs, infusion-related reaction, or immune-related neuropathy; grade 2/3 diarrhea, colitis, or immune-related pancreatitis; grade 3 dermatologic AE; grade 3/4 hyperglycemia or amylase/lipase elevation; symptomatic hypothyroidism or hyperthyroidism; and grade 2–4 symptomatic adrenal insufficiency. If these AEs were not resolved to grade  $\leq 1$  within 12 weeks, atezolizumab treatment was permanently discontinued. Other criteria for atezolizumab discontinuation were: any-grade myasthenia gravis or Guillain-Barré syndrome; any-grade immune-related meningoencephalitis; grade 3/4 pulmonary AEs; grade 3/4 total bilirubin, ALT, or AST increase ( $>3\times$  upper limit of normal); grade 3/4 ocular AEs, infusion-related reaction, or immune-related neuropathy; and grade 4 diarrhea, colitis, immune-related pancreatitis, or dermatologic AEs. Patients received full supportive care, including blood product support, antibiotic treatment, and treatment of other newly diagnosed or concurrent medical conditions.

**eTable 1.** Dosing Information for Atezolizumab<sup>a</sup> and Placebo

|                                                                                                                                                                            | <b>Investigational Arm<br/>(Capecitabine +<br/>Bevacizumab +<br/>Atezolizumab)<br/>(n=81<sup>b</sup>)</b> | <b>Placebo Arm<br/>(Capecitabine +<br/>Beverizumab +<br/>Placebo)<br/>(n=46)</b> | <b>Total<br/>(N=127)</b> |
|----------------------------------------------------------------------------------------------------------------------------------------------------------------------------|-----------------------------------------------------------------------------------------------------------|----------------------------------------------------------------------------------|--------------------------|
| <b>Treatment duration (days)</b>                                                                                                                                           |                                                                                                           |                                                                                  |                          |
| N                                                                                                                                                                          | 81                                                                                                        | 46                                                                               | 127                      |
| Mean (SD)                                                                                                                                                                  | 160.5 (149.7)                                                                                             | 146.7 (144.4)                                                                    | 155.5 (147.4)            |
| Median                                                                                                                                                                     | 125.0                                                                                                     | 90.5                                                                             | 120.0                    |
| Q1, Q3                                                                                                                                                                     | 55.0, 188.0                                                                                               | 55.0, 186.0                                                                      | 55.0, 188.0              |
| Range                                                                                                                                                                      | (0.0–874.0)                                                                                               | (0.0–721.0)                                                                      | (0.0–874.0)              |
| <b>Percentage of targeted dose</b>                                                                                                                                         |                                                                                                           |                                                                                  |                          |
| N                                                                                                                                                                          | 81                                                                                                        | 46                                                                               | 127                      |
| Mean (SD)                                                                                                                                                                  | 96.5 (13.1)                                                                                               | 96.2 (9.9)                                                                       | 96.4 (12.0)              |
| Median                                                                                                                                                                     | 100.0                                                                                                     | 100.0                                                                            | 100.0                    |
| Q1, Q3                                                                                                                                                                     | 100.0, 100.0                                                                                              | 100.0, 100.0                                                                     | 100.0, 100.0             |
| Range                                                                                                                                                                      | (33.3–100.0)                                                                                              | (66.7–100.0)                                                                     | (33.3–100.0)             |
| <b>At least 1 dose delay, n (%)</b>                                                                                                                                        |                                                                                                           |                                                                                  |                          |
| No                                                                                                                                                                         | 56 (69.1%)                                                                                                | 32 (69.6%)                                                                       | 88 (69.3%)               |
| Yes                                                                                                                                                                        | 25 (30.9%)                                                                                                | 14 (30.4%)                                                                       | 39 (30.7%)               |
| <b>No. of dose delays</b>                                                                                                                                                  |                                                                                                           |                                                                                  |                          |
| N                                                                                                                                                                          | 25                                                                                                        | 14                                                                               | 39                       |
| Mean (SD)                                                                                                                                                                  | 2.0 (1.5)                                                                                                 | 1.6 (0.8)                                                                        | 1.8 (1.3)                |
| Median                                                                                                                                                                     | 2.0                                                                                                       | 1.0                                                                              | 1.0                      |
| Q1, Q3                                                                                                                                                                     | 1.0, 2.0                                                                                                  | 1.0, 2.0                                                                         | 1.0, 2.0                 |
| Range                                                                                                                                                                      | (1.0–6.0)                                                                                                 | (1.0–3.0)                                                                        | (1.0–6.0)                |
| <b>At least 1 dose omission, n (%)</b>                                                                                                                                     |                                                                                                           |                                                                                  |                          |
| No                                                                                                                                                                         | 75 (92.6%)                                                                                                | 39 (84.8%)                                                                       | 114 (89.8%)              |
| Yes                                                                                                                                                                        | 6 (7.4%)                                                                                                  | 7 (15.2%)                                                                        | 13 (10.2%)               |
| <b>No. of dose omissions</b>                                                                                                                                               |                                                                                                           |                                                                                  |                          |
| N                                                                                                                                                                          | 6                                                                                                         | 7                                                                                | 13                       |
| Mean (SD)                                                                                                                                                                  | 1.7 (1.2)                                                                                                 | 1.4 (0.8)                                                                        | 1.5 (1.0)                |
| Median                                                                                                                                                                     | 1.0                                                                                                       | 1.0                                                                              | 1.0                      |
| Q1, Q3                                                                                                                                                                     | 1.0, 2.0                                                                                                  | 1.0, 2.0                                                                         | 1.0, 2.0                 |
| Range                                                                                                                                                                      | (1.0–4.0)                                                                                                 | (1.0–3.0)                                                                        | (1.0–4.0)                |
| <sup>a</sup> No reduction of the atezolizumab dose was allowed per protocol. <sup>b</sup> One patient never began protocol treatment. Q, quartile; SD, standard deviation. |                                                                                                           |                                                                                  |                          |

**eTable 2.** Dosing Information for Bevacizumab<sup>a</sup>

|                                        | <b>Investigational Arm<br/>(Capecitabine +<br/>Bevacizumab +<br/>Atezolizumab)<br/>(n=81<sup>b</sup>)</b> | <b>Placebo Arm<br/>(Capecitabine +<br/>Bevacizumab +<br/>Placebo)<br/>(n=46)</b> | <b>Total<br/>(N=127)</b> |
|----------------------------------------|-----------------------------------------------------------------------------------------------------------|----------------------------------------------------------------------------------|--------------------------|
| <b>Treatment duration (days)</b>       |                                                                                                           |                                                                                  |                          |
| N                                      | 81                                                                                                        | 46                                                                               | 127                      |
| Mean (SD)                              | 160.5 (149.7)                                                                                             | 146.7 (144.4)                                                                    | 155.5 (147.4)            |
| Median                                 | 125.0                                                                                                     | 90.5                                                                             | 120.0                    |
| Q1, Q3                                 | 55.0, 188.0                                                                                               | 55.0, 186.0                                                                      | 55.0, 188.0              |
| Range                                  | (0.0–874.0)                                                                                               | (0.0–721.0)                                                                      | (0.0–874.0)              |
| <b>Percentage of targeted dose</b>     |                                                                                                           |                                                                                  |                          |
| N                                      | 81                                                                                                        | 46                                                                               | 127                      |
| Mean (SD)                              | 96.8 (10.3)                                                                                               | 97.7 (9.2)                                                                       | 97.1 (9.9)               |
| Median                                 | 100.0                                                                                                     | 100.2                                                                            | 100.0                    |
| Q1, Q3                                 | 97.9, 100.5                                                                                               | 99.3, 101.7                                                                      | 99.1, 101.0              |
| Range                                  | (49.4–104.9)                                                                                              | (65.5–104.8)                                                                     | (49.4–104.9)             |
| <b>At least 1 dose delay, n (%)</b>    |                                                                                                           |                                                                                  |                          |
| No                                     | 56 (69.1%)                                                                                                | 29 (63.0%)                                                                       | 85 (66.9%)               |
| Yes                                    | 25 (30.9%)                                                                                                | 17 (37.0%)                                                                       | 42 (33.1%)               |
| <b>No. of dose delays</b>              |                                                                                                           |                                                                                  |                          |
| N                                      | 25                                                                                                        | 17                                                                               | 42                       |
| Mean (SD)                              | 1.8 (1.3)                                                                                                 | 1.6 (0.8)                                                                        | 1.7 (1.1)                |
| Median                                 | 1.0                                                                                                       | 1.0                                                                              | 1.0                      |
| Q1, Q3                                 | 1.0, 2.0                                                                                                  | 1.0, 2.0                                                                         | 1.0, 2.0                 |
| Range                                  | (1.0–5.0)                                                                                                 | (1.0–3.0)                                                                        | (1.0–5.0)                |
| <b>At least 1 dose omission, n (%)</b> |                                                                                                           |                                                                                  |                          |
| No                                     | 68 (84.0%)                                                                                                | 40 (87.0%)                                                                       | 108 (85.0%)              |
| Yes                                    | 13 (16.0%)                                                                                                | 6 (13.0%)                                                                        | 19 (15.0%)               |
| <b>No. of dose omissions</b>           |                                                                                                           |                                                                                  |                          |
| N                                      | 13                                                                                                        | 6                                                                                | 19                       |
| Mean (SD)                              | 1.8 (1.3)                                                                                                 | 2.7 (3.6)                                                                        | 2.1 (2.2)                |
| Median                                 | 1.0                                                                                                       | 1.0                                                                              | 1.0                      |
| Q1, Q3                                 | 1.0, 2.0                                                                                                  | 1.0, 2.0                                                                         | 1.0, 2.0                 |
| Range                                  | (1.0–5.0)                                                                                                 | (1.0–10.0)                                                                       | (1.0–10.0)               |

<sup>a</sup>No reduction of the bevacizumab dose was allowed per protocol. <sup>b</sup>One patient never began protocol treatment. Q, quartile; SD, standard deviation.

**eTable 3.** Dosing Information for Capecitabine

|                                         | <b>Investigational Arm<br/>(Capecitabine +<br/>Bevacizumab +<br/>Atezolizumab)<br/>(n=81<sup>a</sup>)</b> | <b>Placebo Arm<br/>(Capecitabine +<br/>Beverizumab +<br/>Placebo)<br/>(n=46)</b> | <b>Total<br/>(N=127)</b> |
|-----------------------------------------|-----------------------------------------------------------------------------------------------------------|----------------------------------------------------------------------------------|--------------------------|
| <b>Treatment duration (days)</b>        |                                                                                                           |                                                                                  |                          |
| N                                       | 81                                                                                                        | 46                                                                               | 127                      |
| Mean (SD)                               | 160.5 (149.7)                                                                                             | 146.7 (144.4)                                                                    | 155.5 (147.4)            |
| Median                                  | 125.0                                                                                                     | 90.5                                                                             | 120.0                    |
| Q1, Q3                                  | 55.0, 188.0                                                                                               | 55.0, 186.0                                                                      | 55.0, 188.0              |
| Range                                   | (0.0–874.0)                                                                                               | (0.0–721.0)                                                                      | (0.0–874.0)              |
| <b>Percentage of targeted dose</b>      |                                                                                                           |                                                                                  |                          |
| N                                       | 81                                                                                                        | 46                                                                               | 127                      |
| Mean (SD)                               | 79.3 (24.1)                                                                                               | 85.9 (18.7)                                                                      | 81.7 (22.4)              |
| Median                                  | 88.6                                                                                                      | 89.6                                                                             | 88.8                     |
| Q1, Q3                                  | 69.8, 94.9                                                                                                | 82.6, 97.9                                                                       | 73.0, 95.9               |
| Range                                   | (0.0–106.3)                                                                                               | (0.0–107.8)                                                                      | (0.0–107.8)              |
| <b>At least 1 dose delay, n (%)</b>     |                                                                                                           |                                                                                  |                          |
| No                                      | 47 (58.0%)                                                                                                | 26 (56.5%)                                                                       | 73 (57.5%)               |
| Yes                                     | 34 (42.0%)                                                                                                | 20 (43.5%)                                                                       | 54 (42.5%)               |
| <b>No. of dose delays</b>               |                                                                                                           |                                                                                  |                          |
| N                                       | 34                                                                                                        | 20                                                                               | 54                       |
| Mean (SD)                               | 1.9 (1.4)                                                                                                 | 1.6 (1.2)                                                                        | 1.8 (1.3)                |
| Median                                  | 1.0                                                                                                       | 1.0                                                                              | 1.0                      |
| Q1, Q3                                  | 1.0, 2.0                                                                                                  | 1.0, 2.0                                                                         | 1.0, 2.0                 |
| Range                                   | (1.0–6.0)                                                                                                 | (1.0–6.0)                                                                        | (1.0–6.0)                |
| <b>At least 1 dose omission, n (%)</b>  |                                                                                                           |                                                                                  |                          |
| No                                      | 31 (38.3%)                                                                                                | 20 (43.5%)                                                                       | 51 (40.2%)               |
| Yes                                     | 50 (61.7%)                                                                                                | 26 (56.5%)                                                                       | 76 (59.8%)               |
| <b>No. of dose omissions</b>            |                                                                                                           |                                                                                  |                          |
| N                                       | 50                                                                                                        | 26                                                                               | 76                       |
| Mean (SD)                               | 2.5 (1.8)                                                                                                 | 2.9 (2.6)                                                                        | 2.6 (2.1)                |
| Median                                  | 2.0                                                                                                       | 2.0                                                                              | 2.0                      |
| Q1, Q3                                  | 1.0, 4.0                                                                                                  | 1.0, 3.0                                                                         | 1.0, 3.5                 |
| Range                                   | (1.0–10.0)                                                                                                | (1.0–12.0)                                                                       | (1.0–12.0)               |
| <b>At least 1 dose reduction, n (%)</b> |                                                                                                           |                                                                                  |                          |
| Missing                                 | 2                                                                                                         | 1                                                                                | 3                        |
| No                                      | 46 (58.2%)                                                                                                | 28 (62.2%)                                                                       | 74 (59.7%)               |
| Yes                                     | 33 (41.8%)                                                                                                | 17 (37.8%)                                                                       | 50 (40.3%)               |
| <b>No. of dose reductions</b>           |                                                                                                           |                                                                                  |                          |
| N                                       | 33                                                                                                        | 17                                                                               | 50                       |
| Mean (SD)                               | 1.5 (0.9)                                                                                                 | 1.2 (0.6)                                                                        | 1.4 (0.8)                |
| Median                                  | 1.0                                                                                                       | 1.0                                                                              | 1.0                      |
| Q1, Q3                                  | 1.0, 2.0                                                                                                  | 1.0, 1.0                                                                         | 1.0, 2.0                 |
| Range                                   | (1.0–5.0)                                                                                                 | (1.0–3.0)                                                                        | (1.0–5.0)                |

<sup>a</sup>One patient never began protocol treatment.  
Q, quartile; SD, standard deviation.

**eTable 4.** BRAF Variation Status of Primary Analysis Population

| MSI Status                                                                                                                                                           |                  |                         |                     |                  |                    |
|----------------------------------------------------------------------------------------------------------------------------------------------------------------------|------------------|-------------------------|---------------------|------------------|--------------------|
|                                                                                                                                                                      | Missing<br>(n=5) | MSI-H or dMMR<br>(n=13) | MSS/pMMR<br>(n=110) | Total<br>(N=128) | P<br>Value         |
| <b>BRAF status, n<br/>(%)</b>                                                                                                                                        |                  |                         |                     |                  | .2329 <sup>a</sup> |
| Missing                                                                                                                                                              | 1                | 0                       | 11                  | 11               |                    |
| Mutant                                                                                                                                                               | 0                | 2 (15.4)                | 6 (6.1)             | 8 (7.1)          |                    |
| Wild-type                                                                                                                                                            | 4                | 11 (84.6)               | 93 (93.9)           | 104 (92.9)       |                    |
| <sup>a</sup> Fisher exact.<br>dMMR, deficient mismatch repair; MSI-H, microsatellite instability high; MSS, microsatellite stable; pMMR, proficient mismatch repair. |                  |                         |                     |                  |                    |

**eTable 5.** Sites of Metastatic Disease (mITT)

| Site, n (%)                                                 | Investigational Arm<br>(Capecitabine +<br>Bevacizumab +<br>Atezolizumab)<br>(n=82) | Placebo Arm<br>(Capecitabine +<br>Beveracizumab +<br>Placebo)<br>(n=46) | Total<br>(N=128) | P Value <sup>a</sup> |
|-------------------------------------------------------------|------------------------------------------------------------------------------------|-------------------------------------------------------------------------|------------------|----------------------|
| <b>Abdominal wall</b>                                       |                                                                                    |                                                                         |                  | .3079                |
| Yes                                                         | 10 (12.2)                                                                          | 3 (6.5)                                                                 | 13 (10.2)        |                      |
| No                                                          | 72 (87.8)                                                                          | 43 (93.5)                                                               | 115 (89.8)       |                      |
| <b>Bone</b>                                                 |                                                                                    |                                                                         |                  | .0079                |
| Yes                                                         | 6 (7.3)                                                                            | 11 (23.9)                                                               | 17 (13.3)        |                      |
| No                                                          | 76 (92.7)                                                                          | 35 (76.1)                                                               | 111 (86.7)       |                      |
| <b>Brain</b>                                                |                                                                                    |                                                                         |                  |                      |
| No                                                          | 82 (100)                                                                           | 46 (100)                                                                | 128 (100)        |                      |
| <b>Liver</b>                                                |                                                                                    |                                                                         |                  | .4053                |
| Yes                                                         | 69 (84.1)                                                                          | 36 (78.3)                                                               | 105 (82.0)       |                      |
| No                                                          | 13 (15.9)                                                                          | 10 (21.7)                                                               | 23 (18.0)        |                      |
| <b>Lung</b>                                                 |                                                                                    |                                                                         |                  | .5234                |
| Yes                                                         | 60 (73.2)                                                                          | 36 (78.3)                                                               | 96 (75.0)        |                      |
| No                                                          | 22 (26.8)                                                                          | 10 (21.7)                                                               | 32 (25.0)        |                      |
| <b>Lymph nodes</b>                                          |                                                                                    |                                                                         |                  | .1041                |
| Yes                                                         | 57 (69.5)                                                                          | 38 (82.6)                                                               | 95 (74.2)        |                      |
| No                                                          | 25 (30.5)                                                                          | 8 (17.4)                                                                | 33 (25.8)        |                      |
| <b>Pelvis</b>                                               |                                                                                    |                                                                         |                  | .8986                |
| Yes                                                         | 15 (18.3)                                                                          | 8 (17.4)                                                                | 23 (18.0)        |                      |
| No                                                          | 67 (81.7)                                                                          | 38 (82.6)                                                               | 105 (82.0)       |                      |
| <b>Peritoneum</b>                                           |                                                                                    |                                                                         |                  | .6238                |
| Yes                                                         | 21 (25.6)                                                                          | 10 (21.7)                                                               | 31 (24.2)        |                      |
| No                                                          | 61 (74.4)                                                                          | 36 (78.3)                                                               | 97 (75.8)        |                      |
| <b>Other</b>                                                |                                                                                    |                                                                         |                  | .8230                |
| Yes                                                         | 10 (12.2)                                                                          | 5 (10.9)                                                                | 15 (11.7)        |                      |
| No                                                          | 72 (87.8%)                                                                         | 41 (89.1%)                                                              | 113 (88.3)       |                      |
| <sup>a</sup> Chi-square.<br>mITT, modified intent-to-treat. |                                                                                    |                                                                         |                  |                      |



**eTable 6.** Response Rates in the Investigational Arm by Sites of Metastatic Disease

| Site                  | Nonresponder<br>(n=75) | Responder<br>(n=7) | Total<br>(N=82) | P Value <sup>a</sup> |
|-----------------------|------------------------|--------------------|-----------------|----------------------|
| <b>Abdominal wall</b> |                        |                    |                 | .3025                |
| Yes                   | 10 (100.0)             | 0 (0.0)            | 10 (12.2)       |                      |
| No                    | 65 (90.3%)             | 7 (9.7%)           | 72 (87.8%)      |                      |
| <b>Bone</b>           |                        |                    |                 | .4591                |
| Yes                   | 5 (83.3)               | 1 (16.7)           | 6 (7.3)         |                      |
| No                    | 70 (92.1)              | 6 (7.9)            | 76 (92.7)       |                      |
| <b>Brain</b>          |                        |                    |                 |                      |
| No                    | 75 (91.5)              | 7 (8.5)            | 82 (100.0)      |                      |
| <b>Liver</b>          |                        |                    |                 | .0408                |
| Yes                   | 65 (94.2)              | 4 (5.8)            | 69 (84.1)       |                      |
| No                    | 10 (76.9)              | 3 (23.1)           | 13 (15.9)       |                      |
| <b>Lung</b>           |                        |                    |                 | .9134                |
| Yes                   | 55 (91.7)              | 5 (8.3)            | 60 (73.2)       |                      |
| No                    | 20 (90.9)              | 2 (9.1)            | 22 (26.8)       |                      |
| <b>Lymph nodes</b>    |                        |                    |                 | .3302                |
| Yes                   | 51 (89.5)              | 6 (10.5)           | 57 (69.5)       |                      |
| No                    | 24 (96.0)              | 1 (4.0)            | 25 (30.5)       |                      |
| <b>Pelvis</b>         |                        |                    |                 | .7743                |
| Yes                   | 14 (93.3)              | 1 (6.7)            | 15 (18.3)       |                      |
| No                    | 61 (91.0)              | 6 (9.0)            | 67 (81.7)       |                      |
| <b>Peritoneum</b>     |                        |                    |                 | .0456                |
| Yes                   | 17 (81.0)              | 4 (19.0)           | 21 (25.6)       |                      |
| No                    | 58 (95.1)              | 3 (4.9)            | 61 (74.4)       |                      |
| <b>Other</b>          |                        |                    |                 | .3025                |
| Yes                   | 10 (100.0%)            | 0 (0.0%)           | 10 (12.2%)      |                      |
| No                    | 65 (90.3%)             | 7 (9.7%)           | 72 (87.8%)      |                      |

<sup>a</sup>Chi-square.

**eTable 7.** Immune-Related Adverse Events Grade 3 or Higher Considered at Least Possibly Related to Treatment

| irAE                                                                                                                                                  | Toxicity                             | Investigational Arm<br>(Capecitabine + Bevacizumab + Atezolizumab)<br>(N=86) | Placebo Arm<br>(Capecitabine + Bevacizumab + Placebo)<br>(N=46) | Total<br>(N=132) |
|-------------------------------------------------------------------------------------------------------------------------------------------------------|--------------------------------------|------------------------------------------------------------------------------|-----------------------------------------------------------------|------------------|
| Any irAE                                                                                                                                              | Any irAE                             | 12 (14.0%)                                                                   | 6 (13.0%)                                                       | 18 (13.6%)       |
| Colitis                                                                                                                                               | Colitis                              | 1 (1.2%)                                                                     | 0 (0.0%)                                                        | 1 (0.8%)         |
|                                                                                                                                                       | Diarrhea                             | 6 (7.0%)                                                                     | 2 (4.3%)                                                        | 8 (6.1%)         |
| Dermatitis                                                                                                                                            | Rash maculo-papular                  | 0 (0.0%)                                                                     | 1 (2.2%)                                                        | 1 (0.8%)         |
| Endocrinopathies                                                                                                                                      | Hyperglycemia                        | 0 (0.0%)                                                                     | 1 (2.2%)                                                        | 1 (0.8%)         |
| Hepatitis                                                                                                                                             | Alanine aminotransferase increased   | 1 (1.2%)                                                                     | 0 (0.0%)                                                        | 1 (0.8%)         |
|                                                                                                                                                       | Alkaline phosphatase increased       | 1 (1.2%)                                                                     | 0 (0.0%)                                                        | 1 (0.8%)         |
|                                                                                                                                                       | Aspartate aminotransferase increased | 2 (2.3%)                                                                     | 0 (0.0%)                                                        | 2 (1.5%)         |
|                                                                                                                                                       | Blood bilirubin increased            | 1 (1.2%)                                                                     | 0 (0.0%)                                                        | 1 (0.8%)         |
| Myocarditis                                                                                                                                           | Myocarditis                          | 1 (1.2%)                                                                     | 0 (0.0%)                                                        | 1 (0.8%)         |
| Myositis                                                                                                                                              | Generalized muscle weakness          | 1 (1.2%)                                                                     | 1 (2.2%)                                                        | 2 (1.5%)         |
| Nephritis                                                                                                                                             | Hematuria                            | 0 (0.0%)                                                                     | 1 (2.2%)                                                        | 1 (0.8%)         |
| Other rheumatological                                                                                                                                 | Arthralgia                           | 1 (1.2%)                                                                     | 1 (2.2%)                                                        | 2 (1.5%)         |
| Pneumonitis                                                                                                                                           | Dyspnea                              | 1 (1.2%)                                                                     | 0 (0.0%)                                                        | 1 (0.8%)         |
| Rhabdomyolysis                                                                                                                                        | Acute kidney injury                  | 0 (0.0%)                                                                     | 1 (2.2%)                                                        | 1 (0.8%)         |
| Number (percentage) of patients who experienced each adverse event code are reported. ALT, alanine aminotransferase; AST, aspartate aminotransferase. |                                      |                                                                              |                                                                 |                  |

**eFigure 1. PFS of Atezolizumab vs Placebo by MSS Status**

**A. MSS patients**

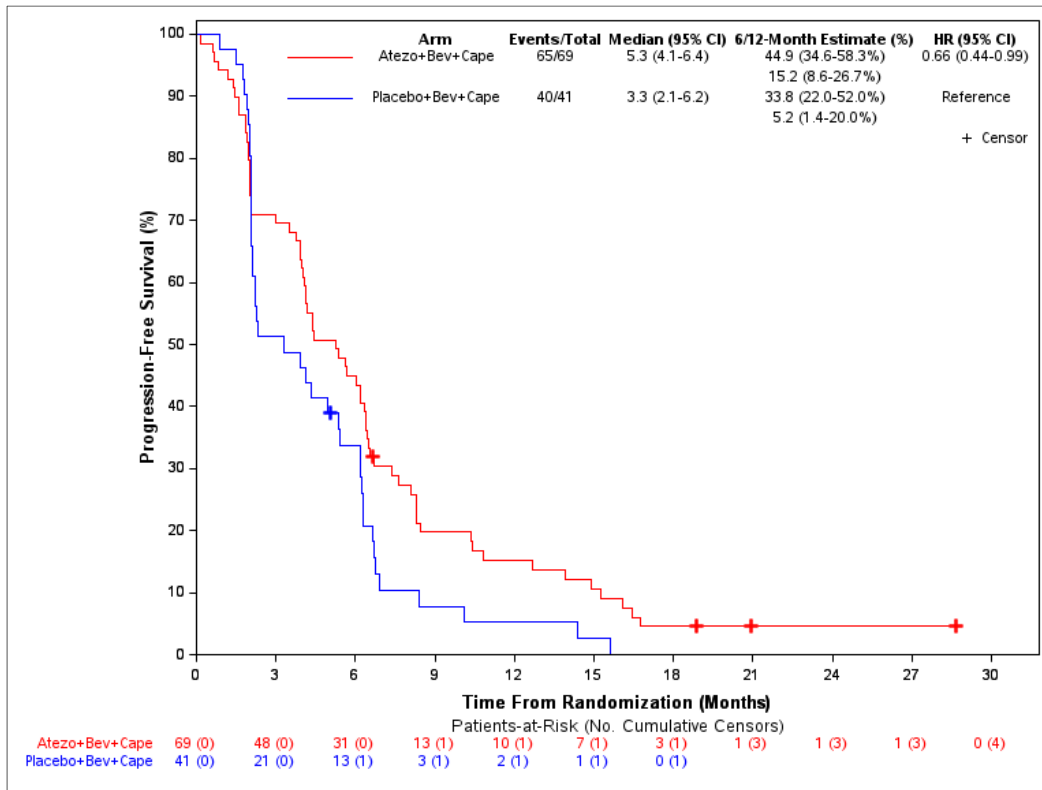

**B. MSI-H or MSI status unknown**

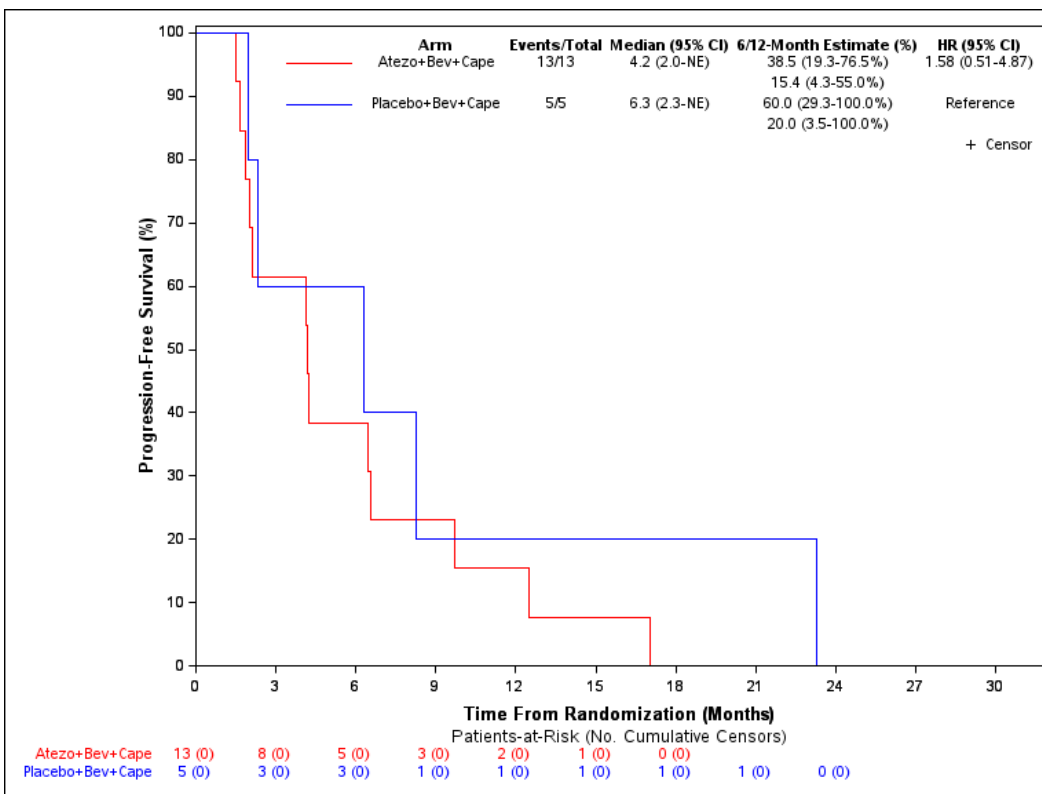

**eFigure 2. Sensitivity Analysis of PFS**

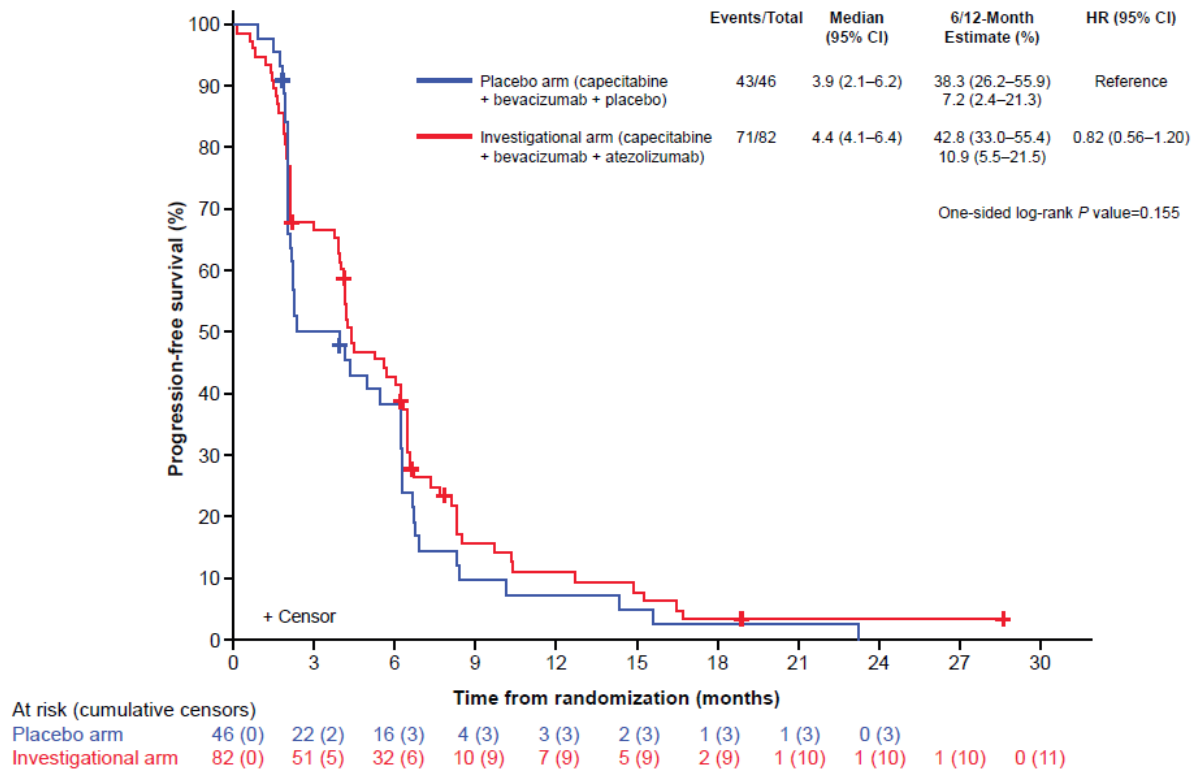

Supplement: jamanetwopen-e2149040-s002.pdf [file jamanetwopen-e2149040-s002.pdf]
