# Supplementary material for: Assessment of Capecitabine and Bevacizumab With or Without Atezolizumab for the Treatment of Refractory Metastatic Colorectal Cancer: A Randomized Clinical Trial
Source: PubMed Central journal article supplement — JAMA Netw Open. 2022 Feb 18;5(2):e2149040. doi: 10.1001/jamanetworkopen.2021.49040 (PMC8857687; doi:10.1001/jamanetworkopen.2021.49040), 2022-02-18
Supplement: jamanetwopen-e2149040-s003.pdf [file jamanetwopen-e2149040-s003.pdf]

## Data Sharing Statement

Mettu. Assessment of Capecitabine and Bevacizumab With or Without Atezolizumab for the Treatment of Refractory Metastatic Colorectal Cancer. *JAMA Netw Open*. Published February 18, 2022. doi:10.1001/jamanetworkopen.2021.49040

### Data

**Data available:** No
